# Supplementary material for: Utilization of carbon dioxide to build a basic block for polymeric materials: an isocyanate-free route to synthesize a soluble oligourea
Source: Royal Society of Chemistry journal article supplement (doi:10.1039/c5ra02819a), 2015-01-01
Supplement: c5ra02819a1.pdf [file c5ra02819a1.pdf]

### *Supporting information*

Utilization of carbon dioxide to build a basic block for polymeric materials: An isocyanate-free route to synthesize soluble oligourea

Zhong Ying, Lijun Zhao, Chao Zhang, Yancun Yu, Tong Liu, Haiyang Cheng, Xiaoru

Li, Fengyu Zhao

Table S1 Comparison of the properties of oligourea from several diamines

| Structure of starting material                                                                                                                                                                                                                                                                         | Properties of produced oligourea |                |
|--------------------------------------------------------------------------------------------------------------------------------------------------------------------------------------------------------------------------------------------------------------------------------------------------------|----------------------------------|----------------|
|                                                                                                                                                                                                                                                                                                        | Solubility in water              | T <sub>m</sub> |
| 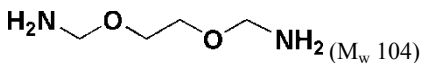<br>$\text{H}_2\text{N}-\text{CH}_2-\text{O}-\text{CH}_2-\text{CH}_2-\text{O}-\text{CH}_2-\text{NH}_2$ ( $M_w$ 104)                                                                                                 | insoluble                        | --             |
| <br>$\text{H}_2\text{N}-\text{CH}_2-\text{CH}_2-\text{O}-\text{CH}_2-\text{CH}_2-\text{O}-\text{CH}_2-\text{CH}_2-\text{NH}_2$ ( $M_w$ 148)                                                                         | insoluble                        | --             |
| <br>$\text{H}_2\text{N}-\text{CH}_2-\text{CH}_2-\text{CH}_2-\text{O}-\text{CH}_2-\text{CH}_2-\text{O}-\text{CH}_2-\text{CH}_2-\text{CH}_2-\text{NH}_2$ ( $M_w$ 176)                                                 | soluble                          | 138            |
| <br>$\text{H}_2\text{N}-\text{CH}_2-\text{CH}_2-\text{CH}_2-\text{CH}_2-\text{O}-\text{CH}_2-\text{CH}_2-\text{CH}_2-\text{CH}_2-\text{O}-\text{CH}_2-\text{CH}_2-\text{CH}_2-\text{NH}_2$ ( $M_w$ 204)             | soluble                          | 131            |
| <br>$\text{H}_2\text{N}-\text{CH}_2-\text{CH}_2-\text{CH}_2-\text{CH}_2-\text{CH}_2-\text{O}-\text{CH}_2-\text{CH}_2-\text{O}-\text{CH}_2-\text{CH}_2-\text{CH}_2-\text{CH}_2-\text{CH}_2-\text{NH}_2$ ( $M_w$ 220) | soluble                          | 110            |
